# Supplementary material for: Compressive Strength Prediction of Rice Husk Ash Concrete Using a Hybrid Artificial Neural Network Model
Source: MDPI journal article supplement (doi:10.3390/ma16083135), 2023-04-16
Supplement: s1 [file s1]

# Compressive Strength Prediction of Rice Husk Ash Concrete Using a Hybrid Artificial Neural Network Model

Chuanqi Li <sup>1,\*</sup>, Xiancheng Mei <sup>2</sup>, Daniel Dias <sup>1</sup>, Zhen Cui <sup>2</sup> and Jian Zhou <sup>3,\*</sup>

<sup>1</sup> Laboratory 3SR, CNRS UMR 5521, Grenoble Alpes University, 38000 Grenoble, France; daniel.dias@univ-grenoble-alpes.fr

<sup>2</sup> Institute of Rock and Soil Mechanics, Chinese Academy of Sciences, Wuhan 430071, China; xcmei@whrsm.ac.cn (X.M.); zcui@whrsm.ac.cn (Z.C.)

<sup>3</sup> School of Resources and Safety Engineering, Central South University, Changsha 410083, China

\* Correspondence: chuanqi.li@univ-grenoble-alpes.fr (C.L.); j.zhou@csu.edu.cn (J.Z.)

| No. | Age (days) | Cement (kg/m <sup>3</sup> ) | Rice husk ash (kg/m <sup>3</sup> ) | Water (kg/m <sup>3</sup> ) | Super plasticizer (kg/m <sup>3</sup> ) | Aggregate (kg/m <sup>3</sup> ) | Experimental compressive strength (Mpa) |
|-----|------------|-----------------------------|------------------------------------|----------------------------|----------------------------------------|--------------------------------|-----------------------------------------|
| 1   | 1          | 495                         | 55                                 | 165                        | 5.8                                    | 1819                           | 22.7                                    |
| 2   | 1          | 500                         | 0                                  | 160                        | 5.5                                    | 1891                           | 20.9                                    |
| 3   | 1          | 400                         | 100                                | 160                        | 6.22                                   | 1859                           | 22                                      |
| 4   | 1          | 425                         | 75                                 | 170                        | 5                                      | 1843                           | 19.7                                    |
| 5   | 1          | 495                         | 55                                 | 165                        | 6.8                                    | 1819                           | 34.7                                    |
| 6   | 1          | 500                         | 0                                  | 160                        | 6.5                                    | 1891                           | 37.8                                    |
| 7   | 1          | 400                         | 100                                | 160                        | 7.36                                   | 1859                           | 34.2                                    |
| 8   | 1          | 425                         | 75                                 | 170                        | 6.4                                    | 1843                           | 32.6                                    |
| 9   | 3          | 495                         | 55                                 | 165                        | 5.8                                    | 1819                           | 47.9                                    |
| 10  | 3          | 500                         | 0                                  | 160                        | 5.5                                    | 1891                           | 41.3                                    |
| 11  | 3          | 400                         | 100                                | 160                        | 6.22                                   | 1859                           | 48.7                                    |
| 12  | 3          | 425                         | 75                                 | 170                        | 5                                      | 1843                           | 45.2                                    |
| 13  | 3          | 378                         | 42                                 | 189                        | 0                                      | 1810                           | 17.6                                    |
| 14  | 3          | 495                         | 55                                 | 165                        | 6.8                                    | 1819                           | 60.8                                    |
| 15  | 3          | 500                         | 0                                  | 160                        | 6.5                                    | 1891                           | 63.9                                    |
| 16  | 3          | 400                         | 100                                | 160                        | 7.36                                   | 1859                           | 60.7                                    |
| 17  | 3          | 425                         | 75                                 | 170                        | 6.4                                    | 1843                           | 57.3                                    |
| 18  | 7          | 495                         | 55                                 | 165                        | 5.8                                    | 1819                           | 60.6                                    |
| 19  | 7          | 500                         | 0                                  | 160                        | 5.5                                    | 1891                           | 51                                      |
| 20  | 7          | 400                         | 100                                | 160                        | 6.22                                   | 1859                           | 61.8                                    |
| 21  | 7          | 375                         | 0                                  | 150                        | 0                                      | 1970                           | 30                                      |
| 22  | 7          | 356.25                      | 18.75                              | 142.5                      | 0                                      | 1970                           | 31.5                                    |
| 23  | 7          | 337.5                       | 37.5                               | 135                        | 0                                      | 1970                           | 32.5                                    |
| 24  | 7          | 318.75                      | 56.25                              | 127.5                      | 0                                      | 1970                           | 35.5                                    |
| 25  | 7          | 300                         | 75                                 | 120                        | 0                                      | 1970                           | 31                                      |
| 26  | 7          | 364                         | 19                                 | 203                        | 0                                      | 1725                           | 27.6                                    |
| 27  | 7          | 306                         | 77                                 | 203                        | 0                                      | 1725                           | 29.7                                    |
| 28  | 7          | 249                         | 134                                | 203                        | 0                                      | 1725                           | 25.7                                    |

|    |    |        |       |       |      |      |      |
|----|----|--------|-------|-------|------|------|------|
| 29 | 7  | 425    | 75    | 170   | 5    | 1843 | 57.6 |
| 30 | 7  | 495    | 55    | 165   | 6.8  | 1819 | 83.6 |
| 31 | 7  | 391    | 29    | 189   | 0    | 1810 | 32.4 |
| 32 | 7  | 500    | 0     | 160   | 6.5  | 1891 | 76.4 |
| 33 | 7  | 400    | 100   | 160   | 7.36 | 1859 | 82.8 |
| 34 | 7  | 425    | 75    | 170   | 6.4  | 1843 | 79.2 |
| 35 | 14 | 345    | 38    | 203   | 0    | 1725 | 35.3 |
| 36 | 14 | 287    | 96    | 203   | 0    | 1725 | 36.1 |
| 37 | 28 | 495    | 55    | 165   | 5.8  | 1819 | 72.8 |
| 38 | 28 | 500    | 0     | 160   | 5.5  | 1891 | 59.6 |
| 39 | 28 | 400    | 100   | 160   | 6.22 | 1859 | 72.7 |
| 40 | 28 | 375    | 0     | 150   | 0    | 1970 | 44.5 |
| 41 | 28 | 356.25 | 18.75 | 142.5 | 0    | 1970 | 45.5 |
| 42 | 28 | 337.5  | 37.5  | 135   | 0    | 1970 | 49.5 |
| 43 | 28 | 318.75 | 56.25 | 127.5 | 0    | 1970 | 50   |
| 44 | 28 | 300    | 75    | 120   | 0    | 1970 | 43   |
| 45 | 28 | 383    | 0     | 203   | 0    | 1725 | 37.1 |
| 46 | 28 | 326    | 57    | 203   | 0    | 1725 | 41.8 |
| 47 | 28 | 268    | 115   | 203   | 0    | 1725 | 37.6 |
| 48 | 28 | 425    | 75    | 170   | 5    | 1843 | 67.2 |
| 49 | 28 | 495    | 55    | 165   | 6.8  | 1819 | 95.2 |
| 50 | 28 | 500    | 0     | 160   | 6.5  | 1891 | 85.7 |
| 51 | 28 | 400    | 100   | 160   | 7.36 | 1859 | 94.3 |
| 52 | 28 | 420    | 0     | 189   | 0    | 1810 | 40.3 |
| 53 | 28 | 357    | 63    | 189   | 0    | 1810 | 46.9 |
| 54 | 28 | 425    | 75    | 170   | 6.4  | 1843 | 90.3 |
| 55 | 56 | 375    | 0     | 150   | 0    | 1970 | 51.5 |
| 56 | 56 | 356.25 | 18.75 | 142.5 | 0    | 1970 | 53.5 |
| 57 | 56 | 337.5  | 37.5  | 135   | 0    | 1970 | 56   |
| 58 | 56 | 318.75 | 56.25 | 127.5 | 0    | 1970 | 59.5 |
| 59 | 56 | 300    | 75    | 120   | 0    | 1970 | 52   |
| 60 | 90 | 495    | 55    | 165   | 5.8  | 1819 | 83.2 |
| 61 | 90 | 500    | 0     | 160   | 5.5  | 1891 | 66.8 |
| 62 | 90 | 400    | 100   | 160   | 6.22 | 1859 | 82.2 |
| 63 | 90 | 425    | 75    | 170   | 5    | 1843 | 75.8 |
| 64 | 90 | 364    | 19    | 203   | 0    | 1725 | 43.3 |
| 65 | 90 | 306    | 77    | 203   | 0    | 1725 | 46   |
| 66 | 90 | 249    | 134   | 203   | 0    | 1725 | 37.2 |
| 67 | 90 | 375    | 0     | 150   | 0    | 1970 | 55.5 |
| 68 | 90 | 356.25 | 18.75 | 142.5 | 0    | 1970 | 56.5 |
| 69 | 90 | 337.5  | 37.5  | 135   | 0    | 1970 | 63   |
| 70 | 90 | 318.75 | 56.25 | 127.5 | 0    | 1970 | 64   |

|     |    |       |        |         |         |      |       |
|-----|----|-------|--------|---------|---------|------|-------|
| 71  | 90 | 300   | 75     | 120     | 0       | 1970 | 61    |
| 72  | 90 | 378   | 42     | 189     | 0       | 1810 | 59    |
| 73  | 90 | 495   | 55     | 165     | 6.8     | 1819 | 104.1 |
| 74  | 90 | 500   | 0      | 160     | 6.5     | 1891 | 94    |
| 75  | 90 | 400   | 100    | 160     | 7.36    | 1859 | 103.3 |
| 76  | 90 | 425   | 75     | 170     | 6.4     | 1843 | 99.1  |
| 77  | 7  | 481   | 48.1   | 169.312 | 3.367   | 1040 | 39.5  |
| 78  | 7  | 427   | 85.4   | 163.968 | 3.416   | 1040 | 30.5  |
| 79  | 7  | 416   | 41.6   | 183.04  | 1.1232  | 1041 | 29.7  |
| 80  | 7  | 370   | 74     | 177.6   | 1.85    | 1041 | 23.6  |
| 81  | 7  | 367   | 36.7   | 201.85  | 1.101   | 1041 | 22.7  |
| 82  | 7  | 327   | 65.4   | 196.2   | 1.308   | 1041 | 20.8  |
| 83  | 28 | 481   | 48.1   | 169.312 | 3.367   | 1040 | 51.4  |
| 84  | 28 | 427   | 85.4   | 163.968 | 3.416   | 1040 | 47.4  |
| 85  | 28 | 416   | 41.6   | 183.04  | 1.1232  | 1041 | 40.8  |
| 86  | 28 | 370   | 74     | 177.6   | 1.85    | 1041 | 39.4  |
| 87  | 28 | 367   | 36.7   | 201.85  | 1.101   | 1041 | 34.5  |
| 88  | 28 | 327   | 65.4   | 196.2   | 1.308   | 1041 | 35.9  |
| 89  | 90 | 481   | 48.1   | 169.312 | 3.367   | 1040 | 64.5  |
| 90  | 90 | 427   | 85.4   | 163.968 | 3.416   | 1040 | 68.5  |
| 91  | 90 | 416   | 41.6   | 183.04  | 1.1232  | 1041 | 51.5  |
| 92  | 90 | 370   | 74     | 177.6   | 1.85    | 1041 | 57.3  |
| 93  | 90 | 367   | 36.7   | 201.85  | 1.101   | 1041 | 44.4  |
| 94  | 90 | 327   | 65.4   | 196.2   | 1.308   | 1041 | 52.9  |
| 95  | 1  | 450   | 0      | 238     | 11.25   | 1405 | 31.5  |
| 96  | 1  | 427.5 | 21.375 | 238     | 10.6875 | 1405 | 32.1  |
| 97  | 1  | 405   | 40.5   | 238     | 10.125  | 1405 | 33.3  |
| 98  | 1  | 382.5 | 57.375 | 238     | 9.5625  | 1405 | 34.5  |
| 99  | 1  | 360   | 72     | 238     | 9       | 1405 | 33.6  |
| 100 | 1  | 337.5 | 84.375 | 238     | 8.4375  | 1405 | 29.3  |
| 101 | 1  | 315   | 94.5   | 238     | 7.875   | 1405 | 29    |
| 102 | 28 | 450   | 0      | 238     | 11.25   | 1405 | 41.7  |
| 103 | 28 | 427.5 | 21.375 | 238     | 10.6875 | 1405 | 42.7  |
| 104 | 28 | 405   | 40.5   | 238     | 10.125  | 1405 | 44.2  |
| 105 | 28 | 382.5 | 57.375 | 238     | 9.5625  | 1405 | 46.8  |
| 106 | 28 | 360   | 72     | 238     | 9       | 1405 | 43.5  |
| 107 | 28 | 337.5 | 84.375 | 238     | 8.4375  | 1405 | 39.5  |
| 108 | 28 | 315   | 94.5   | 238     | 7.875   | 1405 | 38.2  |
| 109 | 56 | 450   | 0      | 238     | 11.25   | 1405 | 49.1  |
| 110 | 56 | 427.5 | 21.375 | 238     | 10.6875 | 1405 | 50.2  |
| 111 | 56 | 405   | 40.5   | 238     | 10.125  | 1405 | 52.1  |
| 112 | 56 | 382.5 | 57.375 | 238     | 9.5625  | 1405 | 55.3  |

|     |    |       |        |     |         |      |      |
|-----|----|-------|--------|-----|---------|------|------|
| 113 | 56 | 360   | 72     | 238 | 9       | 1405 | 55.2 |
| 114 | 56 | 337.5 | 84.375 | 238 | 8.4375  | 1405 | 47   |
| 115 | 56 | 315   | 94.5   | 238 | 7.875   | 1405 | 45.9 |
| 116 | 90 | 450   | 0      | 238 | 11.25   | 1405 | 52.6 |
| 117 | 90 | 427.5 | 21.375 | 238 | 10.6875 | 1405 | 54.9 |
| 118 | 90 | 405   | 40.5   | 238 | 10.125  | 1405 | 57.3 |
| 119 | 90 | 382.5 | 57.375 | 238 | 9.5625  | 1405 | 61.2 |
| 120 | 90 | 360   | 72     | 238 | 9       | 1405 | 55.5 |
| 121 | 90 | 337.5 | 84.375 | 238 | 8.4375  | 1405 | 51.9 |
| 122 | 90 | 315   | 94.5   | 238 | 7.875   | 1405 | 50.2 |
| 123 | 1  | 783   | 87     | 212 | 3.6     | 1277 | 41   |
| 124 | 1  | 571   | 0      | 219 | 1       | 1566 | 30   |
| 125 | 1  | 514   | 57     | 218 | 1.4     | 1541 | 27   |
| 126 | 1  | 457   | 114    | 216 | 2.6     | 1515 | 26   |
| 127 | 1  | 400   | 171    | 215 | 3.7     | 1490 | 19   |
| 128 | 1  | 383   | 42     | 221 | 0.3     | 1670 | 16   |
| 129 | 3  | 783   | 87     | 212 | 3.6     | 1277 | 59   |
| 130 | 3  | 571   | 0      | 219 | 1       | 1566 | 46   |
| 131 | 3  | 514   | 57     | 218 | 1.4     | 1541 | 41   |
| 132 | 3  | 457   | 114    | 216 | 2.6     | 1515 | 38   |
| 133 | 3  | 400   | 171    | 215 | 3.7     | 1490 | 32   |
| 134 | 3  | 383   | 42     | 221 | 0.3     | 1670 | 26   |
| 135 | 7  | 783   | 87     | 212 | 3.6     | 1277 | 62   |
| 136 | 7  | 571   | 0      | 219 | 1       | 1566 | 50   |
| 137 | 7  | 514   | 57     | 218 | 1.4     | 1541 | 47   |
| 138 | 7  | 457   | 114    | 216 | 2.6     | 1515 | 47   |
| 139 | 7  | 400   | 171    | 215 | 3.7     | 1490 | 43   |
| 140 | 7  | 383   | 42     | 221 | 0.3     | 1670 | 37   |
| 141 | 14 | 783   | 87     | 212 | 3.6     | 1277 | 63   |
| 142 | 14 | 571   | 0      | 219 | 1       | 1566 | 54   |
| 143 | 14 | 514   | 57     | 218 | 1.4     | 1541 | 52   |
| 144 | 14 | 457   | 114    | 216 | 2.6     | 1515 | 52   |
| 145 | 14 | 400   | 171    | 215 | 3.7     | 1490 | 51   |
| 146 | 14 | 383   | 42     | 221 | 0.3     | 1670 | 40   |
| 147 | 28 | 783   | 87     | 212 | 3.6     | 1277 | 66   |
| 148 | 28 | 571   | 0      | 219 | 1       | 1566 | 56   |
| 149 | 28 | 514   | 57     | 218 | 1.4     | 1541 | 61   |
| 150 | 28 | 457   | 114    | 216 | 2.6     | 1515 | 60   |
| 151 | 28 | 400   | 171    | 215 | 3.7     | 1490 | 54   |
| 152 | 28 | 383   | 42     | 221 | 0.3     | 1670 | 47   |
| 153 | 56 | 783   | 87     | 212 | 3.6     | 1277 | 69   |
| 154 | 56 | 571   | 0      | 219 | 1       | 1566 | 60   |

|     |    |     |     |     |     |      |      |
|-----|----|-----|-----|-----|-----|------|------|
| 155 | 56 | 514 | 57  | 218 | 1.4 | 1541 | 62   |
| 156 | 56 | 457 | 114 | 216 | 2.6 | 1515 | 61   |
| 157 | 56 | 400 | 171 | 215 | 3.7 | 1490 | 60   |
| 158 | 56 | 383 | 42  | 221 | 0.3 | 1670 | 51   |
| 159 | 90 | 783 | 87  | 212 | 3.6 | 1277 | 74   |
| 160 | 90 | 571 | 0   | 219 | 1   | 1566 | 67   |
| 161 | 90 | 514 | 57  | 218 | 1.4 | 1541 | 67   |
| 162 | 90 | 457 | 114 | 216 | 2.6 | 1515 | 69   |
| 163 | 90 | 400 | 171 | 215 | 3.7 | 1490 | 64   |
| 164 | 90 | 383 | 42  | 221 | 0.3 | 1670 | 56   |
| 165 | 7  | 364 | 19  | 203 | 0   | 1725 | 27.6 |
| 166 | 7  | 345 | 38  | 203 | 0   | 1725 | 28   |
| 167 | 7  | 326 | 57  | 203 | 0   | 1725 | 29.3 |
| 168 | 7  | 306 | 77  | 203 | 0   | 1725 | 29.7 |
| 169 | 7  | 287 | 96  | 203 | 0   | 1725 | 28.7 |
| 170 | 7  | 268 | 115 | 203 | 0   | 1725 | 27.4 |
| 171 | 7  | 249 | 134 | 203 | 0   | 1725 | 25.7 |
| 172 | 14 | 364 | 19  | 203 | 0   | 1725 | 34.2 |
| 173 | 14 | 345 | 38  | 203 | 0   | 1725 | 35.3 |
| 174 | 14 | 326 | 57  | 203 | 0   | 1725 | 36   |
| 175 | 14 | 306 | 77  | 203 | 0   | 1725 | 39.3 |
| 176 | 14 | 287 | 96  | 203 | 0   | 1725 | 36.1 |
| 177 | 14 | 268 | 115 | 203 | 0   | 1725 | 33.5 |
| 178 | 14 | 249 | 134 | 203 | 0   | 1725 | 31.1 |
| 179 | 28 | 364 | 19  | 203 | 0   | 1725 | 40   |
| 180 | 28 | 345 | 38  | 203 | 0   | 1725 | 41.3 |
| 181 | 28 | 326 | 57  | 203 | 0   | 1725 | 41.8 |
| 182 | 28 | 306 | 77  | 203 | 0   | 1725 | 42.5 |
| 183 | 28 | 287 | 96  | 203 | 0   | 1725 | 38.8 |
| 184 | 28 | 268 | 115 | 203 | 0   | 1725 | 37.6 |
| 185 | 28 | 249 | 134 | 203 | 0   | 1725 | 35.1 |
| 186 | 90 | 364 | 19  | 203 | 0   | 1725 | 43.3 |
| 187 | 90 | 345 | 38  | 203 | 0   | 1725 | 44.8 |
| 188 | 90 | 326 | 57  | 203 | 0   | 1725 | 45.7 |
| 189 | 90 | 306 | 77  | 203 | 0   | 1725 | 46   |
| 190 | 90 | 287 | 96  | 203 | 0   | 1725 | 43   |
| 191 | 90 | 268 | 115 | 203 | 0   | 1725 | 38.7 |
| 192 | 90 | 249 | 134 | 203 | 0   | 1725 | 37.2 |
